# Supplementary material for: Ternary PtFeCo alloys on graphene with high electrocatalytic activities for methanol oxidation
Source: Royal Society of Chemistry journal article supplement (doi:10.1039/d0nr00757a), 2020-01-01
Supplement: d0nr00757a1.pdf [file d0nr00757a1.pdf]

Supporting materials for:

**Ternary PtFeCo Alloys on Graphene with Highly Electrocatalytic  
Activities for Methanol Oxidation**

Hongfei Wang<sup>1</sup>, Kefu Zhang<sup>1</sup>, Jun Qiu<sup>1</sup>, Juan Wu<sup>1</sup>, Jingwen Shao<sup>1</sup>, Huijuan Wang<sup>1</sup>,  
Yujuan Zhang<sup>2</sup>, Jie Han<sup>2</sup>, Yong Zhang<sup>3</sup>, Lifeng Yan<sup>1,\*</sup>

<sup>1</sup>CAS Key Laboratory of Soft Matter Chemistry, Hefei National Laboratory for  
Physical Sciences at the Microscale, and Department of Chemical Physics, University  
of Science and Technology of China, Hefei, 230026, P.R.China

<sup>2</sup> Yanchang Petroleum (Group) Co.,Ltd., No.61 Tangyan Rd, Xi'an, Shaanxi,  
P.R.China 710065

<sup>3</sup>The Northwest Research Institute of Chemical Industry Co.,Ltd, Xi'an, Shaanxi,  
710061, P.R.China

**Table S1.** The inductively coupled plasma atomic emission spectroscopy (ICP-AES) results for all samples.

| <b>Samples</b>                                                        | <b>Mass%</b><br><b>(Pt, ICP-</b><br><b>AES)</b> | <b>Elements</b> | <b>Atom%</b><br><b>(feeding</b><br><b>ratio)</b> | <b>Atom%</b><br><b>(ICP-AES)</b> |
|-----------------------------------------------------------------------|-------------------------------------------------|-----------------|--------------------------------------------------|----------------------------------|
| <b>Pt<sub>30</sub>Fe<sub>37</sub>Co<sub>33</sub>@G-7%</b>             | 6.85%                                           | Pt:Fe:Co        | 32:34:34                                         | 30:37:33                         |
| <b>Pt<sub>52</sub>Fe<sub>29</sub>Co<sub>19</sub>@G-7%</b>             | 6.93%                                           | Pt:Fe:Co        | 50:25:25                                         | 52:29:19                         |
| <b>Pt<sub>64</sub>Fe<sub>20</sub>Co<sub>16</sub>@G-7%</b>             | 7.09%                                           | Pt:Fe:Co        | 70:15:15                                         | 64:20:16                         |
| <b>Pt<sub>58</sub>Fe<sub>42</sub>@G-7%</b>                            | 6.87%                                           | Pt:Fe           | 50:50                                            | 58:42                            |
| <b>Pt<sub>52</sub>Co<sub>48</sub>@G-7%</b>                            | 6.72%                                           | Pt:Co           | 50:50                                            | 52:48                            |
| <b>Pt<sub>48</sub>Fe<sub>25</sub>Co<sub>27</sub>@G-</b><br><b>10%</b> | 9.88%                                           | Pt:Fe:Co        | 50:25:25                                         | 48:25:27                         |
| <b>Pt<sub>51</sub>Fe<sub>27</sub>Co<sub>22</sub>@G-4%</b>             | 4.11%                                           | Pt:Fe:Co        | 50:25:25                                         | 51:27:22                         |
| <b>Pt<sub>50</sub>Fe<sub>28</sub>Co<sub>22</sub>@G-1%</b>             | 1.03%                                           | Pt:Fe:Co        | 50:25:25                                         | 50:28:22                         |

**Table S2.** XRD values of all PtFeCo@G-7% samples.

| <b>Samples</b>                                            | <b>2<math>\theta</math>/degree</b> | <b>Experimental</b> | <b>Theoretical</b> | <b>d<sub>(111)</sub></b> | <b>Strain</b> |
|-----------------------------------------------------------|------------------------------------|---------------------|--------------------|--------------------------|---------------|
|                                                           | <b>e</b>                           | <b>lattice</b>      | <b>lattice</b>     | <b>spacing</b>           | <b>(%)</b>    |
|                                                           | <b>(111)</b>                       | <b>parameter</b>    | <b>parameter</b>   | <b>(nm)</b>              |               |
|                                                           |                                    | <b>(Å)</b>          | <b>(Å)</b>         |                          |               |
| <b>Pt (JCPDS No. 04-0802)</b>                             | 39.76                              | 3.923               |                    | 0.2265                   |               |
| <b>Pt<sub>30</sub>Fe<sub>37</sub>Co<sub>33</sub>@G-7%</b> | 41.10                              | 3.795               | 3.407              | 0.2191                   | 3.27          |
| <b>Pt<sub>52</sub>Fe<sub>29</sub>Co<sub>19</sub>@G-7%</b> | 40.66                              | 3.838               | 3.545              | 0.2216                   | 2.16          |
| <b>Pt<sub>64</sub>Fe<sub>20</sub>Co<sub>16</sub>@G-7%</b> | 40.48                              | 3.862               | 3.651              | 0.2230                   | 1.55          |

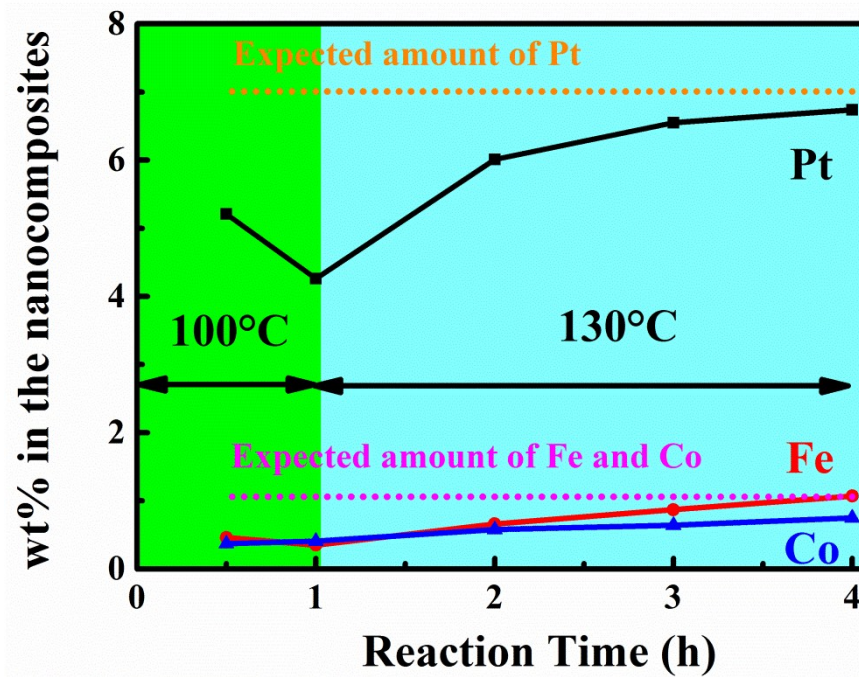

**Figure S1.** the elemental weight composition of  $\text{Pt}_{52}\text{Fe}_{29}\text{Co}_{19}@G-7\%$  as a function of the reaction time.

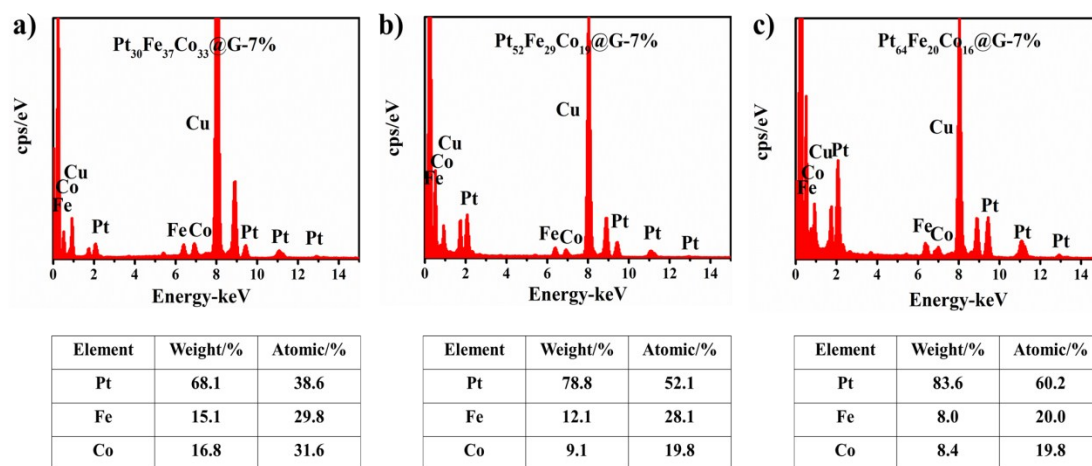

**Figure S2.** EDX-area analyses of (a)  $Pt_{30}Fe_{37}Co_{33}@G-7\%$ , (b)  $Pt_{52}Fe_{29}Co_{19}@G-7\%$ , and (c)  $Pt_{64}Fe_{20}Co_{16}@G-7\%$  nanocomposites.

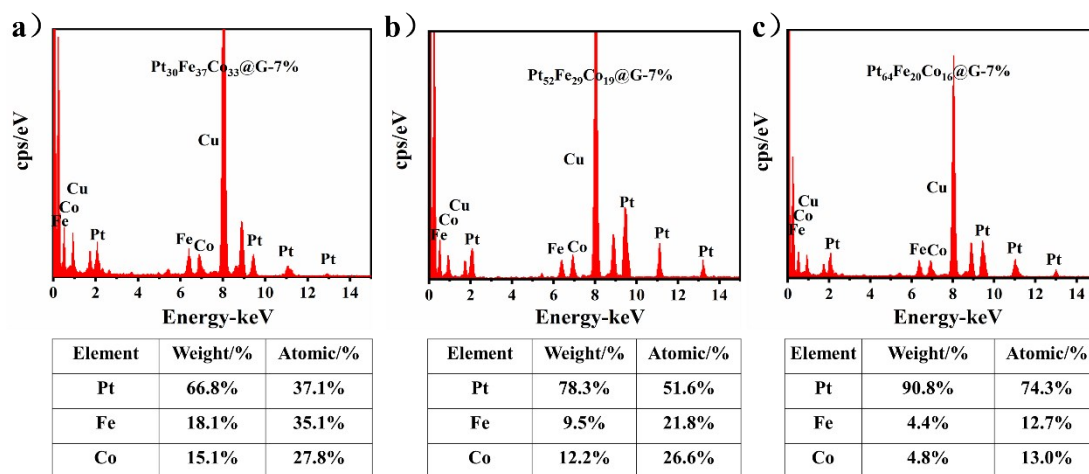

**Figure S3.** EDX-particle analyses of (a)  $\text{Pt}_{30}\text{Fe}_{37}\text{Co}_{33}@G-7\%$ , (b)  $\text{Pt}_{52}\text{Fe}_{29}\text{Co}_{19}@G-7\%$ , and (c)  $\text{Pt}_{64}\text{Fe}_{20}\text{Co}_{16}@G-7\%$  nanocomposites.

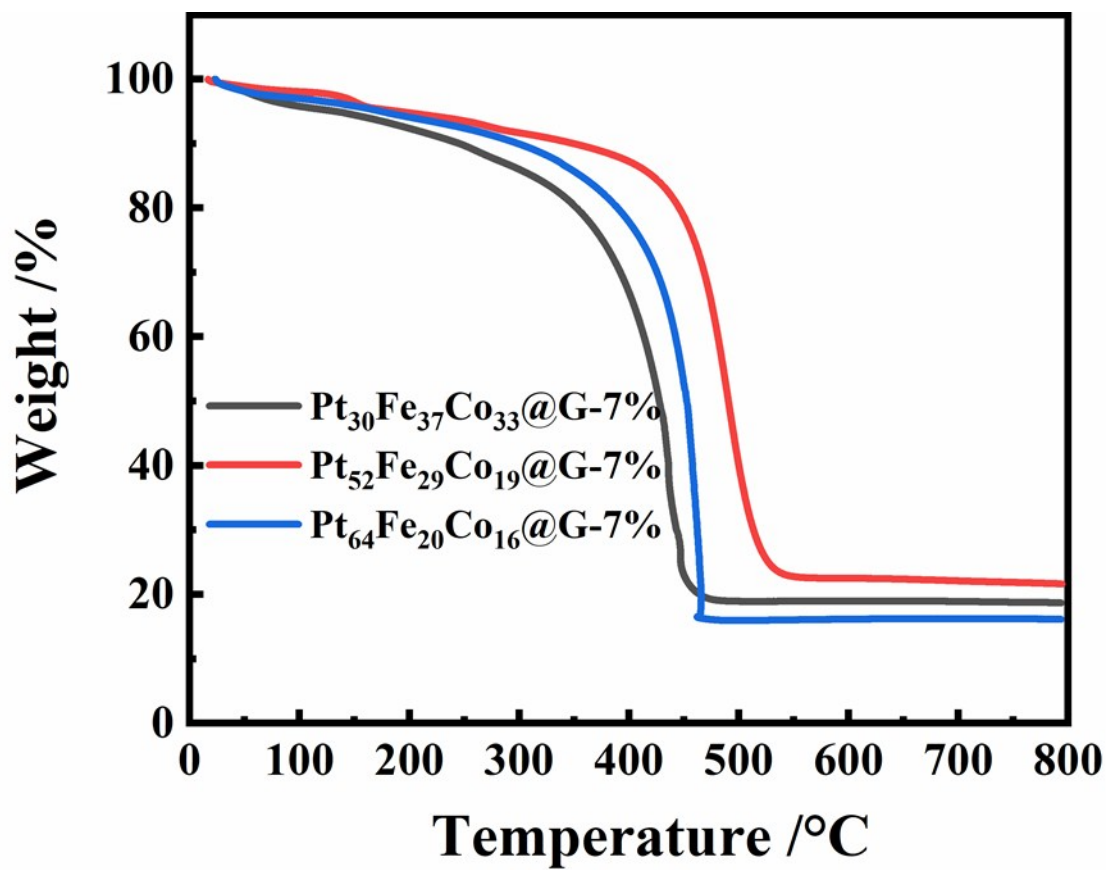

Figure S4. TGA curves of Pt<sub>30</sub>Fe<sub>37</sub>Co<sub>33</sub>@G-7%, Pt<sub>52</sub>Fe<sub>29</sub>Co<sub>19</sub>@G-7%, and Pt<sub>64</sub>Fe<sub>20</sub>Co<sub>16</sub>@G-7% nanocomposites.

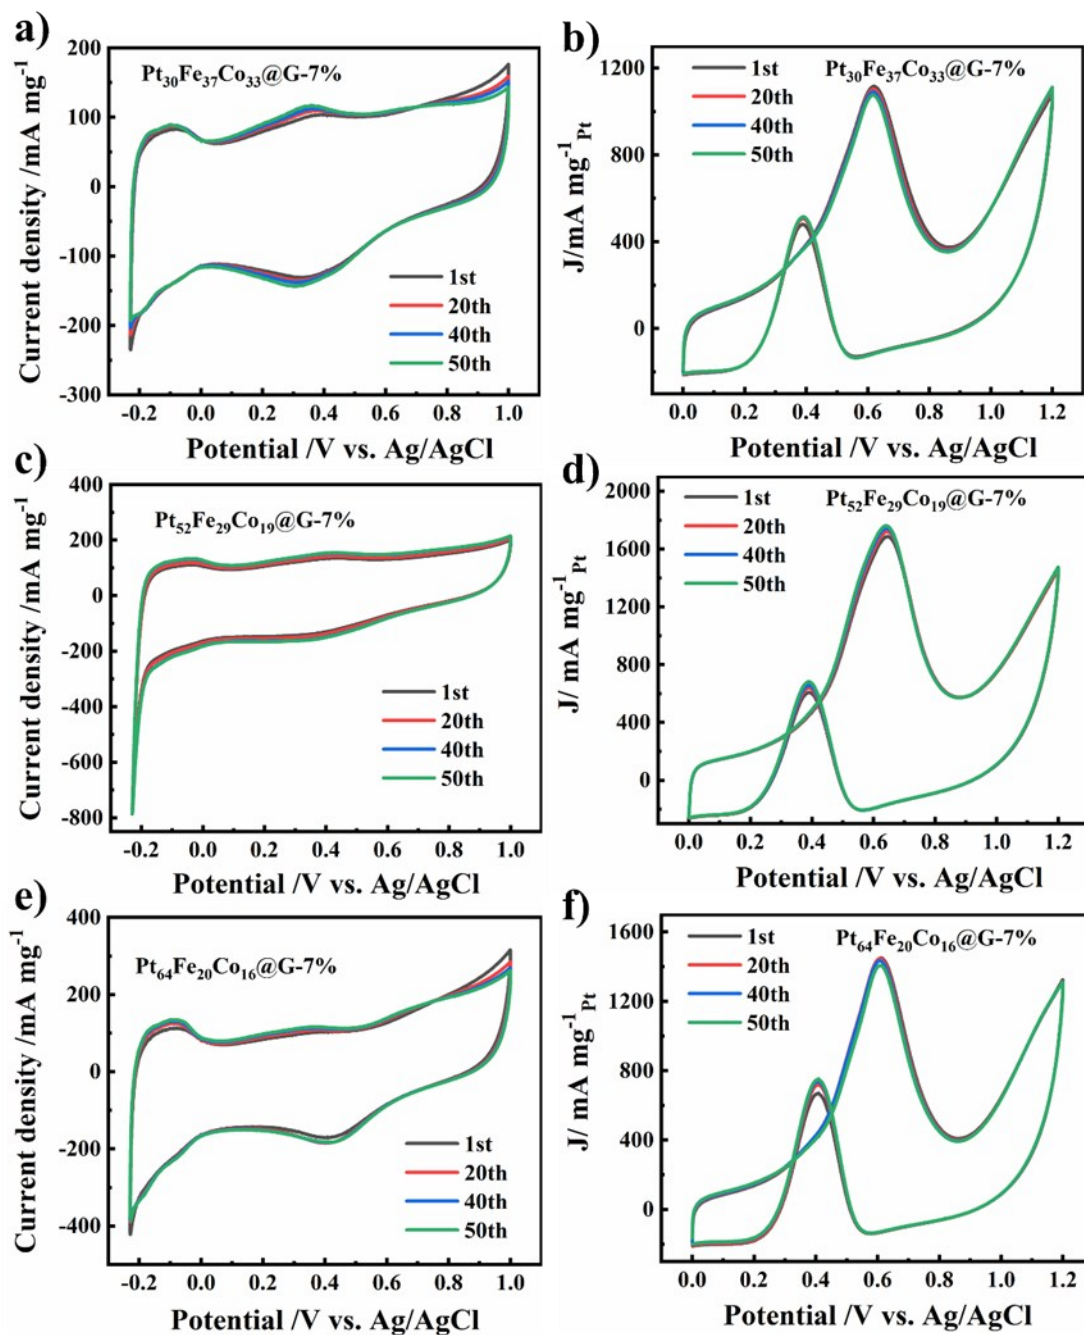

**Figure S5.** CV curves of (a) Pt<sub>30</sub>Fe<sub>37</sub>Co<sub>33</sub>@G-7%, (c) Pt<sub>52</sub>Fe<sub>29</sub>Co<sub>19</sub>@G-7%, (e) Pt<sub>64</sub>Fe<sub>20</sub>Co<sub>16</sub>@G-7% electrodes in 0.5 M H<sub>2</sub>SO<sub>4</sub> at 50 mV s<sup>-1</sup> from the 1st circle to the 50th circle; CV curves of (b) Pt<sub>30</sub>Fe<sub>37</sub>Co<sub>33</sub>@G-7%, (d) Pt<sub>52</sub>Fe<sub>29</sub>Co<sub>19</sub>@G-7%, (f) Pt<sub>64</sub>Fe<sub>20</sub>Co<sub>16</sub>@G-7% electrodes in 0.5 M H<sub>2</sub>SO<sub>4</sub> + 0.5 M CH<sub>3</sub>OH at 50 mV s<sup>-1</sup> from the 1st circle to the 50th circle.



**Table S3.** The onset potentials and peak potentials of CO oxidation for Pt<sub>30</sub>Fe<sub>37</sub>Co<sub>33</sub>@G-7%, Pt<sub>52</sub>Fe<sub>29</sub>Co<sub>19</sub>@G-7%, Pt<sub>64</sub>Fe<sub>20</sub>Co<sub>16</sub>@G-7% and Pt/C

|                                                              | onset potential of<br>CO oxidation (V) | peak potential of<br>CO oxidation (V) |
|--------------------------------------------------------------|----------------------------------------|---------------------------------------|
| Pt <sub>30</sub> Fe <sub>37</sub> Co <sub>33</sub> @G-<br>7% | 0.44                                   | 0.57                                  |
| Pt <sub>52</sub> Fe <sub>29</sub> Co <sub>19</sub> @G-<br>7% | 0.40                                   | 0.56                                  |
| Pt <sub>64</sub> Fe <sub>20</sub> Co <sub>16</sub> @G-<br>7% | 0.45                                   | 0.60                                  |
| Pt/C                                                         | 0.50                                   | 0.66                                  |

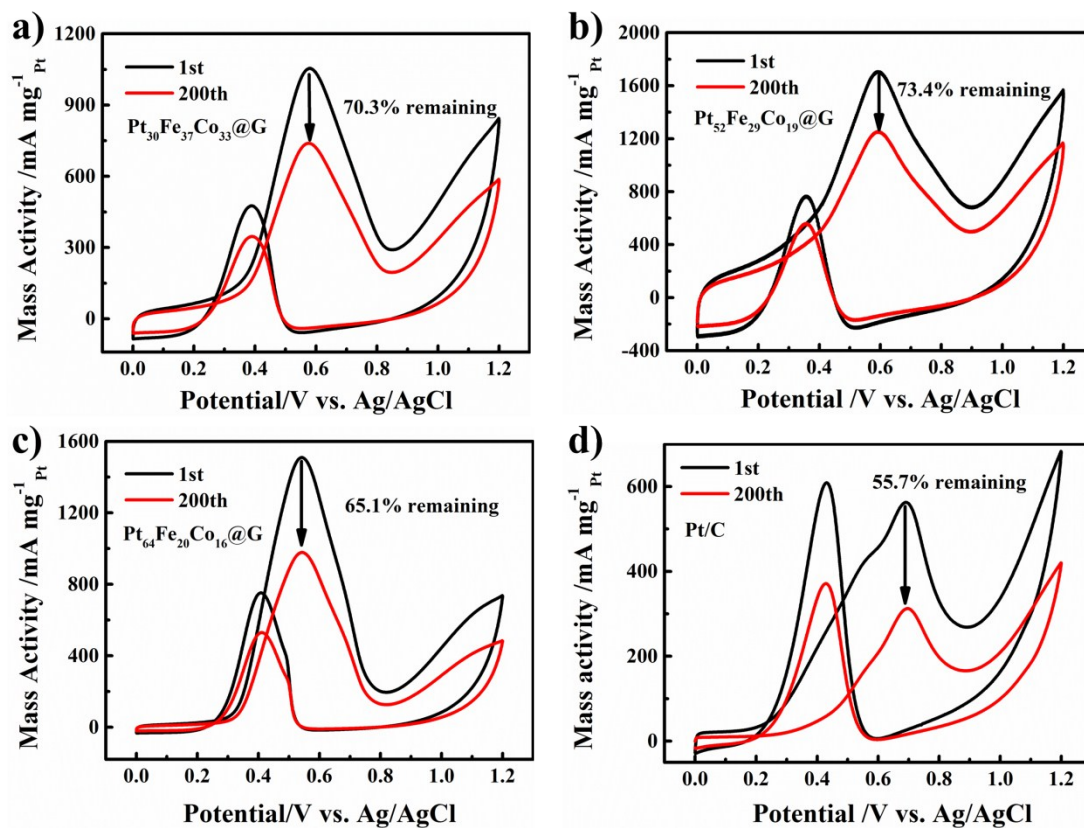

**Figure S6.** CV curves recorded at a sweep rate of  $50 \text{ mV s}^{-1}$  in  $0.5 \text{ M H}_2\text{SO}_4$  and  $0.5 \text{ M CH}_3\text{OH}$  aqueous solution for the 1st and 200th cycles.

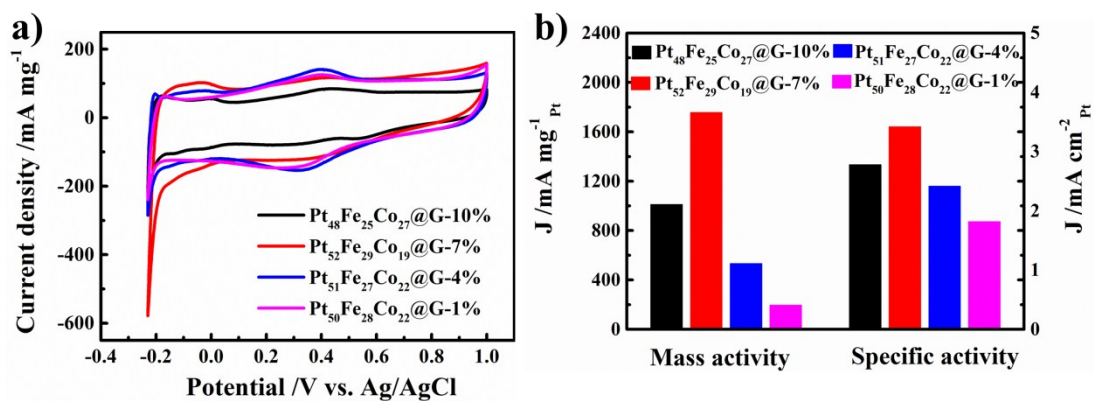

**Figure S7.** (a) CV curves of Pt<sub>48</sub>Fe<sub>25</sub>Co<sub>27</sub>@G-10%, Pt<sub>52</sub>Fe<sub>29</sub>Co<sub>19</sub>@G-7%, Pt<sub>51</sub>Fe<sub>27</sub>Co<sub>22</sub>@G-4% and Pt<sub>50</sub>Fe<sub>28</sub>Co<sub>22</sub>@G-1% electrodes in 0.5 M H<sub>2</sub>SO<sub>4</sub> at a scan rate of 50 mV s<sup>-1</sup>; (b) Bar graph illuminating the mass activities (left) and specific activities (right) at anodic peak potential.
